# Supplementary material for: Glia Maturation Factor Beta as a Novel Biomarker and Therapeutic Target for Hepatocellular Carcinoma
Source: Front Oncol. 2021 Nov 2;11:744331. doi: 10.3389/fonc.2021.744331 (PMC8593204; doi:10.3389/fonc.2021.744331)
Supplement: Supplementary file 6 [file Table_6.xlsx]

## Sheet: down-GO
Table S6A GO enrichment of down-regulated DEGs
Category	Term	Count	%	PValue	Genes	List Total	Pop Hits	Pop Total	Fold Enrichment	Bonferroni	Benjamini	FDR
GOTERM_BP_DIRECT	GO:0006412~translation	108	8.83797	1.34971e-61	RPL5, RPL30, RPL32, RPL31, RPL34, RPL6, RPS15, RPS14, RPS17, RPS16, RPS19, RPL18A, RPL36, RPL35, RPL38, RPL37, RPS11, RPL39, RPS10, RPS13, RPS9, RPS7, RPS8, RPL23, RPS6, MRPS18A, RPSA, MRPS18C, NHP2, RPL24, RPL27, RPL26, RPL29, RPL28, UBA52, MRPL16, MRPL17, MRPL14, MRPL11, MRPL20, EEFSEC, RPL41, MRPL27, MRPL28, MRPL23, MRPL24, MRPL21, MRPL22, RPL27A, RPS20, RPS21, RPS24, MRPS17, SLC25A1, MRPS15, …	1060	253	16792	6.76238	3.50655e-58	3.50655e-58	3.44716e-58
GOTERM_BP_DIRECT	GO:0006614~SRP-dependent cotranslational protein targeting to membrane	58	4.74632	1.81864e-44	RPL5, RPL30, RPL32, RPL31, RPL34, RPLP1, RPLP0, RPL6, RPS15, RPS14, RPL7A, RPS17, RPS16, RPS19, RPL18A, RPL36, RPLP2, RPL35, RPL38, RPL37, RPS11, RPL39, RPS10, RPS13, RPS9, RPS7, RPS8, RPL23, RPS6, RPL13A, RPSA, RPL37A, RPL24, RPL27, RPL26, RPL29, RPL28, UBA52, RPL10, RPL12, RPL11, RPS15A, RPS3, RPL14, RPL13, RPS2, RPL15, RPL18, RPL19, RPL41, RPL35A, RPL23A, RPL27A, RPS20, FAU, RPS21, RPL26L1, RP…	1060	94	16792	9.77455	4.72482e-41	2.36241e-41	2.3224e-41
GOTERM_BP_DIRECT	GO:0006364~rRNA processing	82	6.71031	2.53643e-42	RPL5, RPL30, DDX49, RPL32, RPL31, RPL34, RPLP1, SUV39H1, RPLP0, RRP1, RRP8, RPL6, RPS15, FBL, RPS14, RPL7A, RPS17, RPS16, RPS19, RPL18A, RPL36, RPLP2, RPL35, RPL38, RPL37, RPS11, RPL39, RPS10, RPS13, PELP1, RPS9, RPS7, RPS8, IMP3, RPL23, PIH1D1, RPS6, DDX56, RPL13A, IMP4, RPSA, RPL37A, FRG1, RPP21, RPL24, RPL27, RPL26, RPL29, RPL28, UBA52, RPL10, RPL12, RPL11, RPS27L, NOC4L, RRP7A, EXOSC7, EXOSC5…	1060	214	16792	6.07011	6.58964e-39	2.19655e-39	2.15935e-39
GOTERM_BP_DIRECT	GO:0006413~translational initiation	66	5.40098	1.76385e-41	RPL5, RPL30, RPL32, RPL31, RPL34, RPLP1, RPLP0, RPL6, RPS15, RPS14, RPL7A, RPS17, RPS16, RPS19, RPL18A, RPL36, RPLP2, RPL35, RPL38, RPL37, RPS11, RPL39, RPS10, RPS13, RPS9, RPS7, RPS8, RPL23, RPS6, RPL13A, RPSA, RPL37A, RPL24, RPL27, RPL26, RPL29, EIF4E2, RPL28, UBA52, RPL10, RPL12, RPL11, RPS15A, RPS3, RPL14, RPL13, RPS2, RPL15, RPL18, RPL19, EIF2B4, RPL41, EIF2B3, RPL35A, RPL23A, EIF1, EIF3K, E…	1060	137	16792	7.63168	4.58248e-38	1.14562e-38	1.12622e-38
GOTERM_BP_DIRECT	GO:0070125~mitochondrial translational elongation	52	4.25532	1.45269e-39	MRPS17, MRPS15, MRPS16, MRPS11, MRPS12, MRPL38, MRPL36, MRPL37, MRPL34, MRPL32, MRPL4, MRPL41, MRPL2, MRPL40, CHCHD1, TSFM, MRPS26, MRPS24, MRPS25, MRPS18A, MRPS21, MRPL47, MRPL48, MRPS7, MRPL46, MRPL43, MRPS5, MRPS18C, TUFM, MRPL52, MRPL53, MRPS9, MRPL51, AURKAIP1, MRPS36, MRPS33, MRPS34, MRPL16, MRPL17, MRPL14, MRPL12, MRPL54, MRPL55, MRPL11, MRPL20, GADD45GIP1, MRPL27, MRPL28, MRPL23, MRPL24, …	1060	85	16792	9.69128	3.77408e-36	7.54817e-37	7.42033e-37
GOTERM_BP_DIRECT	GO:0019083~viral transcription	58	4.74632	1.17455e-38	RPL5, RPL30, RPL32, RPL31, RPL34, RPLP1, RPLP0, RPL6, RPS15, RPS14, RPL7A, RPS17, RPS16, RPS19, RPL18A, RPL36, RPLP2, RPL35, RPL38, RPL37, RPS11, RPL39, RPS10, RPS13, RPS9, RPS7, RPS8, RPL23, RPS6, RPL13A, RPSA, RPL37A, RPL24, RPL27, RPL26, RPL29, RPL28, UBA52, RPL10, RPL12, RPL11, RPS15A, RPS3, RPL14, RPL13, RPS2, RPL15, RPL18, RPL19, RPL41, RPL35A, RPL23A, RPL27A, RPS20, FAU, RPS21, RPL26L1, RP…	1060	112	16792	8.20364	3.05149e-35	5.08581e-36	4.99967e-36
GOTERM_BP_DIRECT	GO:0000184~nuclear-transcribed mRNA catabolic process, nonsense-mediated decay	58	4.74632	8.67037e-37	RPL5, RPL30, RPL32, RPL31, RPL34, RPLP1, RPLP0, RPL6, RPS15, RPS14, RPL7A, RPS17, RPS16, RPS19, RPL18A, RPL36, RPLP2, RPL35, RPL38, RPL37, RPS11, RPL39, RPS10, RPS13, RPS9, RPS7, RPS8, RPL23, RPS6, RPL13A, RPSA, RPL37A, RPL24, RPL27, RPL26, RPL29, RPL28, UBA52, RPL10, RPL12, RPL11, RPS15A, RPS3, RPL14, RPL13, RPS2, RPL15, RPL18, RPL19, RPL41, RPL35A, RPL23A, RPL27A, RPS20, FAU, RPS21, RPL26L1, RP…	1060	119	16792	7.72107	2.25256e-33	3.21795e-34	3.16345e-34
GOTERM_BP_DIRECT	GO:0070126~mitochondrial translational termination	50	4.09165	1.5526e-36	MRPS17, MRPS15, MRPS16, MRPS11, MRPS12, MRPL38, MRPL36, MRPL37, MRPL34, MRPL32, MRPL4, MRPL41, MRPL2, MRPL40, CHCHD1, MRPS26, MRPS24, MRPS25, MRPS18A, MRPS21, MRPL47, MRPL48, MRPS7, MRPL46, MRPL43, MRPS5, MRPS18C, MRPL52, MRPL53, MRPS9, MRPL51, AURKAIP1, MRPS36, MRPS33, MRPS34, MRPL16, MRPL17, MRPL14, MRPL12, MRPL54, MRPL55, MRPL11, MRPL20, GADD45GIP1, MRPL27, MRPL28, MRPL23, MRPL24, MRPL21, MRPL…	1060	86	16792	9.21018	4.03366e-33	5.04208e-34	4.95669e-34
GOTERM_BP_DIRECT	GO:0006120~mitochondrial electron transport, NADH to ubiquinone	37	3.02782	4.08383e-33	NDUFB9, NDUFA13, NDUFB8, NDUFB7, NDUFB6, NDUFB10, NDUFA11, NDUFB11, NDUFA12, NDUFB5, NDUFB4, NDUFA10, NDUFB3, NDUFB2, NDUFB1, NDUFV3, NDUFV2, NDUFV1, NDUFA9, NDUFA8, NDUFA7, NDUFA6, NDUFA5, NDUFA4, NDUFA3, NDUFA2, NDUFA1, NDUFC2, NDUFC1, COQ9, NDUFS8, NDUFS7, NDUFS6, NDUFS5, NDUFAB1, NDUFS4, NDUFS3	1060	49	16792	11.962	1.06098e-29	1.17886e-30	1.1589e-30
GOTERM_BP_DIRECT	GO:0032981~mitochondrial respiratory chain complex I assembly	41	3.35516	1.08095e-32	NDUFB9, NDUFA13, NDUFB8, NDUFB7, NDUFB6, NDUFB10, NDUFA11, NDUFB11, NDUFA12, NDUFB5, NDUFB4, NDUFA10, NDUFB3, NDUFB2, NDUFB1, ECSIT, TAZ, NDUFV3, NDUFV2, NDUFV1, NDUFA9, NDUFA8, NDUFA7, NDUFA6, NDUFA5, NDUFA3, NDUFA2, NDUFA1, NDUFC2, NDUFC1, BCS1L, NDUFS8, NDUFS7, NDUFS6, NDUFAF4, NDUFS5, NDUFAB1, NDUFS4, NDUFAF2, NDUFS3, NDUFAF3	1060	63	16792	10.3096	2.8083e-29	2.8083e-30	2.76074e-30
GOTERM_BP_DIRECT	GO:0032543~mitochondrial translation	21	1.71849	2.30685e-15	MRPS17, MRPS15, NDUFA7, MRPS16, MRPS24, MRPS11, MRPS12, MRPS34, MRPL16, MRPS18A, MRPS2, MRPS21, MRPL47, MRPL23, MRPS7, MRPS18C, MRPL2, MRPL51, PTRH1, HARS, CHCHD1	1060	36	16792	9.24088	6.05715e-12	5.44835e-13	5.35608e-13
GOTERM_BP_DIRECT	GO:0042776~mitochondrial ATP synthesis coupled proton transport	15	1.2275	1.11054e-12	STOML2, ATP5J, ATP5C1, ATP5I, ATP5G3, ATP5H, ATP5G2, COX5B, ATP5O, ATP5G1, ATP5L, ATP5J2, ATP5E, ATP5D, CYC1	1060	21	16792	11.3154	2.88522e-09	2.40433e-10	2.36361e-10
GOTERM_BP_DIRECT	GO:1902600~hydrogen ion transmembrane transport	20	1.63666	3.14747e-09	COX8A, COX7B, SURF1, UQCRB, NDUFA4, COX4I1, COX4I2, COX7A2, UQCR11, UQCR10, COX6C, COX6A1, COX5A, COX7C, UQCRHL, UQCRH, COX6B1, UQCRQ, UQCRC1, UQCRFS1	1060	61	16792	5.19394	8.17709e-06	6.29009e-07	6.18356e-07
GOTERM_BP_DIRECT	GO:0006754~ATP biosynthetic process	14	1.14566	6.10062e-09	SURF1, ATP5J, CHCHD10, ATP5C1, ATP5I, ATP5G3, ATP5H, ATP5G2, ATP5O, ATP5G1, ATP5L, ATP5J2, ATP5E, ATP5D	1060	29	16792	7.64763	1.58493e-05	1.1321e-06	1.11293e-06
GOTERM_BP_DIRECT	GO:0051436~negative regulation of ubiquitin-protein ligase activity involved in mitotic cell cycle	20	1.63666	5.02393e-08	ANAPC16, PSMD13, PSMA7, ANAPC11, PSMD8, PSMB6, PSMD9, PSMB7, PSMC5, PSMB4, PSMC3, PSMD4, UBB, PSMC4, PSMA2, PSMB3, PSMC1, PSMB1, UBA52, ANAPC2	1060	71	16792	4.4624	0.000130513	8.48085e-06	8.33722e-06
GOTERM_BP_DIRECT	GO:0000028~ribosomal small subunit assembly	11	0.900164	5.223e-08	RPS15, RRP7A, RPS14, RPS17, RPS19, MRPS11, RPS27L, RPSA, ERAL1, MRPS7, RPS10	1060	19	16792	9.1714	0.000135684	8.48085e-06	8.33722e-06
GOTERM_BP_DIRECT	GO:0006626~protein targeting to mitochondrion	14	1.14566	6.20103e-08	DNAJC19, TIMM8B, FIS1, TOMM40, MTX1, TIMM13, AIP, TIMM44, TIMM22, TIMM10, TOMM22, TOMM7, TIMM17B, TOMM5	1060	34	16792	6.52297	0.00016109	9.47664e-06	9.31614e-06
GOTERM_BP_DIRECT	GO:0038061~NIK/NF-kappaB signaling	19	1.55483	8.1987e-08	PSMD13, PSMA7, PSMD8, PSMB6, PSMD9, PSMB7, PSMC5, PSMB4, PPP4C, PSMC3, PSMD4, UBB, PSMC4, PSMA2, PSMB3, PSMC1, PSMB1, UBA52, UBE2M	1060	66	16792	4.56043	0.00021298	1.18335e-05	1.1633e-05
GOTERM_BP_DIRECT	GO:0006123~mitochondrial electron transport, cytochrome c to oxygen	11	0.900164	9.8549e-08	COX8A, COX7B, NDUFA4, COX4I1, COX4I2, COX5B, COX6C, COX6A1, COX5A, COX7C, COX6B1	1060	20	16792	8.71283	0.000255997	1.34753e-05	1.32471e-05
GOTERM_BP_DIRECT	GO:0002181~cytoplasmic translation	12	0.981997	1.16975e-07	MRPL2, RPL31, RPLP1, RPLP0, RPL36, RPL35A, RPLP2, RPL26, RPL15, RPL29, RPL6, RPL26L1	1060	25	16792	7.60392	0.000303855	1.51951e-05	1.49377e-05
GOTERM_BP_DIRECT	GO:0051437~positive regulation of ubiquitin-protein ligase activity involved in regulation of mitotic cell cycle transition	20	1.63666	1.63989e-07	ANAPC16, PSMD13, PSMA7, ANAPC11, PSMD8, PSMB6, PSMD9, PSMB7, PSMC5, PSMB4, PSMC3, PSMD4, UBB, PSMC4, PSMA2, PSMB3, PSMC1, PSMB1, UBA52, ANAPC2	1060	76	16792	4.16882	0.000425951	2.02877e-05	1.99441e-05
GOTERM_BP_DIRECT	GO:0031145~anaphase-promoting complex-dependent catabolic process	20	1.63666	3.16307e-07	ANAPC16, PSMD13, PSMA7, ANAPC11, PSMD8, PSMB6, PSMD9, PSMB7, PSMC5, PSMB4, PSMC3, PSMD4, UBB, PSMC4, PSMA2, PSMB3, PSMC1, PSMB1, UBA52, ANAPC2	1060	79	16792	4.01051	0.000821429	3.7353e-05	3.67204e-05
GOTERM_BP_DIRECT	GO:0006521~regulation of cellular amino acid metabolic process	16	1.30933	3.33954e-07	PSMD13, OAZ1, PSMA7, PSMD8, PSMB6, PSMD9, PSMB7, PSMC5, PSMB4, PSMC3, PSMD4, PSMC4, PSMA2, PSMB3, PSMC1, PSMB1	1060	51	16792	4.96989	0.000867236	3.77223e-05	3.70834e-05
GOTERM_BP_DIRECT	GO:0009060~aerobic respiration	13	1.06383	3.82713e-07	UCN, SURF1, UQCRB, UQCR10, COX6A1, UQCRHL, UQCRH, SIRT3, CHCHD5, BLOC1S1, UQCRC1, NDUFV1, FXN	1060	33	16792	6.24059	0.000993794	4.14287e-05	4.0727e-05
GOTERM_BP_DIRECT	GO:0055114~oxidation-reduction process	70	5.72831	5.27463e-07	DHRS12, DHRS11, TECR, COX4I2, NDUFA10, ALKBH7, ECSIT, ALKBH6, TM7SF2, TXNDC17, TXN2, CHCHD4, NSDHL, ALKBH4, SPR, OGFOD2, FDXR, DHRS4L1, DHRS4L2, GSTK1, MECR, GPX4, GSTO1, DCXR, RSAD1, HSD11B1L, POR, NDUFS7, SCO2, UQCRC1, BLVRB, RDH5, PAOX, UQCRB, MRPS36, HAAO, PPOX, HSD17B10, UQCRH, PRDX2, PRDX5, DHRS7B, PNPO, PCBD1, RDH13, DECR2, NDUFA8, SURF1, NQO2, EGLN2, NDUFA6, PTGES2, TXNRD2, DOHH, DHRS1, C…	1060	592	16792	1.87315	0.00136941	5.4814e-05	5.38856e-05
GOTERM_BP_DIRECT	GO:0006122~mitochondrial electron transport, ubiquinol to cytochrome c	9	0.736498	1.05288e-06	UQCRB, UQCRQ, UQCRC1, UQCRFS1, UQCR11, CYC1, UQCR10, UQCRHL, UQCRH	1060	15	16792	9.50491	0.00273165	0.000105207	0.000103425
GOTERM_BP_DIRECT	GO:0000027~ribosomal large subunit assembly	10	0.818331	2.24622e-06	MRPL20, RPL5, RPL10, RPL12, RPL11, PPAN, RPL24, RPL23A, RPL6, MRPL11	1060	21	16792	7.54358	0.0058187	0.000216137	0.000212476
GOTERM_BP_DIRECT	GO:0015986~ATP synthesis coupled proton transport	10	0.818331	3.58875e-06	ATP5EP2, ATP5D, ATP5J, ATP5C1, ATP5G3, ATP5H, ATP5G2, ATP5O, ATP5G1, ATP5L	1060	22	16792	7.20069	0.00928027	0.000332985	0.000327346
GOTERM_BP_DIRECT	GO:0006119~oxidative phosphorylation	8	0.654664	4.76814e-06	SURF1, UQCRB, ATP5D, UQCRC1, CHCHD10, ATP5C1, FXN, UQCRH	1060	13	16792	9.74862	0.0123112	0.000427159	0.000419925
GOTERM_BP_DIRECT	GO:0043488~regulation of mRNA stability	21	1.71849	5.67708e-06	PSMD13, PSMA7, EXOSC7, PSMD8, PSMB6, PSMD9, PSMB7, PSMC5, EXOSC5, PSMB4, EXOSC4, PSMC3, PSMD4, UBB, PSMC4, PSMA2, PSMB3, PSMC1, PSMB1, UBA52, EXOSC1	1060	103	16792	3.22982	0.0146408	0.000491635	0.000483308
GOTERM_BP_DIRECT	GO:0006283~transcription-coupled nucleotide-excision repair	17	1.39116	1.16871e-05	GPS1, XPA, GTF2H5, POLD4, XAB2, COPS6, UBB, RPA3, ERCC1, POLD2, PPIE, POLR2F, POLR2H, POLR2I, UBA52, POLR2J, POLR2L	1060	74	16792	3.63927	0.0299069	0.000979454	0.000962865
GOTERM_BP_DIRECT	GO:0000398~mRNA splicing, via spliceosome	32	2.61866	2.57838e-05	SF3B5, DGCR14, WDR83, U2AF1L4, SART1, UBL5, SNRPD2, SNRNP70, ZMAT5, POLR2F, POLR2H, TXNL4A, SNRNP35, POLR2I, POLR2J, CTNNBL1, POLR2L, BUD31, CWC15, LSM5, LSM4, LSM3, XAB2, LSM7, FRG1, PPIE, PRPF31, GEMIN6, SNRNP25, GEMIN7, SNRPF, SNRPA	1060	222	16792	2.28346	0.0647928	0.00209332	0.00205787
GOTERM_BP_DIRECT	GO:0042274~ribosomal small subunit biogenesis	8	0.654664	2.68687e-05	RPS15, RPS17, RPS16, RPS7, RPS19, RPS6, SURF6, RPS24	1060	16	16792	7.92075	0.0674252	0.0021153	0.00207948
GOTERM_BP_DIRECT	GO:0002479~antigen processing and presentation of exogenous peptide antigen via MHC class I, TAP-dependent	15	1.2275	2.93912e-05	PSMD13, PSMA7, PSMD8, PSMB6, PSMD9, PSMB7, PSMC5, PSMB4, PSMC3, PSMD4, PSMC4, PSMA2, PSMB3, PSMC1, PSMB1	1060	63	16792	3.77179	0.073517	0.00224584	0.0022078
GOTERM_BP_DIRECT	GO:0030150~protein import into mitochondrial matrix	8	0.654664	4.31924e-05	TOMM40, GRPEL1, DNLZ, TOMM7, TIMM17B, TIMM44, TIMM50, TOMM22	1060	17	16792	7.45483	0.106149	0.00320611	0.00315181
GOTERM_BP_DIRECT	GO:0060071~Wnt signaling pathway, planar cell polarity pathway	18	1.473	5.45274e-05	PSMD13, PSMA7, PSMD8, PSMB6, PSMD9, PSMB7, PSMC5, PSMB4, PSMC3, PSMD4, UBB, PSMC4, PSMA2, PSMB3, PSMC1, PSMB1, AP2S1, UBA52	1060	92	16792	3.09943	0.132089	0.00393506	0.00386842
GOTERM_BP_DIRECT	GO:0002223~stimulatory C-type lectin receptor signaling pathway	19	1.55483	9.26648e-05	PSMD13, ICAM3, PSMA7, PSMD8, PSMB6, PSMD9, PSMB7, PSMC5, PSMB4, PSMC3, PSMD4, UBB, PSMC4, PSMA2, PSMB3, PSMC1, PSMB1, HRAS, UBA52	1060	105	16792	2.86656	0.213965	0.00650657	0.00639637
GOTERM_BP_DIRECT	GO:0042273~ribosomal large subunit biogenesis	9	0.736498	0.000100299	RPL5, NOP16, RPL11, RPL14, WDR74, RPL35A, SURF6, RPL26, RPL26L1	1060	25	16792	5.70294	0.229403	0.00685729	0.00674115
GOTERM_BP_DIRECT	GO:0000302~response to reactive oxygen species	11	0.900164	0.000112783	PRDX2, PRDX5, CCS, GPX1, TXNRD2, HYAL1, NUDT2, APOE, PRDX6, TXN2, SOD1	1060	39	16792	4.46812	0.253999	0.00740853	0.00728306
GOTERM_BP_DIRECT	GO:0000462~maturation of SSU-rRNA from tricistronic rRNA transcript (SSU-rRNA, 5.8S rRNA, LSU-rRNA)	10	0.818331	0.000114065	RPS14, MRPS9, TBL3, RPS16, RPS19, RPS8, MRPS11, TSR2, NOC4L, RPS24	1060	32	16792	4.95047	0.256479	0.00740853	0.00728306
GOTERM_BP_DIRECT	GO:0009142~nucleoside triphosphate biosynthetic process	7	0.572831	0.000120038	AK1, NME2, NME3, NME4, SUCLG1, NME2P1, NME1	1060	14	16792	7.92075	0.267929	0.00760631	0.00747749
GOTERM_BP_DIRECT	GO:0006163~purine nucleotide metabolic process	6	0.490998	0.000190631	GUK1, NME2, NME3, NME4, NME2P1, NME1	1060	10	16792	9.50491	0.390616	0.0117919	0.0115922
GOTERM_BP_DIRECT	GO:0090090~negative regulation of canonical Wnt signaling pathway	24	1.96399	0.000234009	PSMD13, IGFBP4, CBY1, PSMA7, AES, PSMD8, PSMB6, PSMD9, PSMB7, PSMC5, PSMB4, SDHAF2, PSMC3, PSMD4, UBB, TMEM88, PSMC4, PSMA2, PSMB3, PSMC1, PSMB1, APOE, UBA52, PFDN5	1060	163	16792	2.33249	0.455576	0.0141385	0.0138991
GOTERM_BP_DIRECT	GO:0006091~generation of precursor metabolites and energy	12	0.981997	0.000391624	COX8A, GCGR, COX4I1, ATPIF1, COX4I2, PHKG2, COX17, FDXR, UQCR11, COX6C, COX6A1, COX7C	1060	53	16792	3.58676	0.638552	0.0231236	0.022732
GOTERM_BP_DIRECT	GO:0033209~tumor necrosis factor-mediated signaling pathway	19	1.55483	0.000417969	PSMD13, PSMA7, TXNDC17, PSMD8, PSMB6, PSMD9, PSMB7, PSMC5, PSMB4, KRT18, PSMC3, PSMD4, UBB, PSMC4, PSMA2, PSMB3, PSMC1, PSMB1, UBA52	1060	118	16792	2.55075	0.662474	0.0241308	0.0237221
GOTERM_BP_DIRECT	GO:0043161~proteasome-mediated ubiquitin-dependent protein catabolic process	27	2.20949	0.000452177	UBXN1, ANAPC16, PSMD13, PSMA7, ANAPC11, PSMD8, PSMB6, ZNRF1, PSMD9, PSMB7, PSMB4, PSMD4, UBB, PSMB3, PSMB1, RAD23A, PSMC5, RNF126, CDC34, PSMC3, PSMC4, PSMA2, PSMC1, RNF181, STUB1, UBA52, ANAPC2	1060	203	16792	2.107	0.691188	0.0255382	0.0251057
GOTERM_BP_DIRECT	GO:0043248~proteasome assembly	6	0.490998	0.000538584	PSMD8, PSMD4, PSMD13, SHFM1, ADRM1, PSMG4	1060	12	16792	7.92075	0.753309	0.0297711	0.0292669
GOTERM_CC_DIRECT	GO:0005743~mitochondrial inner membrane	166	13.5843	1.55449e-87	NDUFA13, NDUFA11, NDUFA12, NDUFA10, MPV17L2, ATP5C1, COX6A1, TOMM22, CHCHD6, FPGS, FDXR, PMPCA, CHCHD1, GSTK1, MRPS18A, GCAT, COX6B1, ATP5J2, MRPS18C, TUFM, SCO2, TMEM126A, PPIF, UQCRC1, SUCLG1, AURKAIP1, NDUFB10, UQCRB, NDUFB11, MRPL16, ATP5J, MRPL17, ATP5I, MRPL14, PHB, ATP5H, ATP5O, MRPL12, UQCRH, ATP5L, TIMM50, MRPL11, MRPL20, PTPMT1, ATP5D, CYC1, RDH13, NDUFV3, NDUFV2, NDUFV1, DNAJC19, SURF1…	1115	441	18224	6.15231	8.42535e-85	8.42535e-85	7.89682e-85
GOTERM_CC_DIRECT	GO:0005739~mitochondrion	257	21.0311	1.28644e-66	RPL34, CISD1, NUDT1, ATP5C1, CISD3, RPS14, AS3MT, COMTD1, FDXR, CDK5RAP1, HEMK1, GSTK1, ACOT8, MECR, ENDOG, TSTD1, OXSM, RSAD1, CMC1, ECH1, BOLA1, BCS1L, HDHD3, GCAT, MRPS18C, POR, SCO2, CLPP, UQCRC1, TMEM126A, JTB, SUCLG1, AURKAIP1, GCDH, ATP5J, ATP5I, MRPL14, ATP5H, SDSL, ATP5O, MRPL12, ATP5L, DGUOK, MRPL20, PRDX5, GRPEL1, NTHL1, PTPMT1, ATP5D, RDH13, FIS1, PRELID1, MRPL28, ERAL1, MRPL23, MCAT,…	1115	1331	18224	3.1559	6.97249e-64	3.48625e-64	3.26755e-64
GOTERM_CC_DIRECT	GO:0005840~ribosome	88	7.20131	4.66856e-61	MRPS17, RPL5, RPL30, MRPS15, MRPS16, RPL32, RPL31, RPL34, RPLP1, MRPS11, RPLP0, MRPL38, MRPL37, MRPL34, MRPL32, RPL6, MRPL4, RPS15, RPS14, RPL7A, RPS17, MRPL2, RPS16, RPS19, RPL18A, RPL36, RPLP2, RPL35, RPL38, RPL37, RPS11, RPS10, RPS13, RPS9, RPS7, MRPS25, RPS8, RPL23, RPS6, MRPS18A, MRPS2, MRPS21, RPL13A, MRPS7, MRPL43, MRPS18C, MRPL53, MRPS9, RPL37A, RPL24, RPL27, RPL29, RPL28, UBA52, RPS19BP1…	1115	166	18224	8.6645	2.53036e-58	8.43453e-59	7.90543e-59
GOTERM_CC_DIRECT	GO:0005747~mitochondrial respiratory chain complex I	37	3.02782	1.39855e-33	NDUFB9, NDUFA13, NDUFB8, NDUFB7, NDUFB6, NDUFB10, NDUFA11, NDUFB11, NDUFA12, NDUFB5, NDUFB4, NDUFA10, NDUFB3, NDUFB2, NDUFB1, PARK7, NDUFV3, NDUFV2, NDUFV1, NDUFA9, NDUFA8, NDUFA7, NDUFA6, NDUFA5, NDUFA4, NDUFA3, NDUFA2, NDUFA1, NDUFC2, NDUFC1, NDUFS8, NDUFS7, NDUFS6, NDUFS5, NDUFAB1, NDUFS4, NDUFS3	1115	49	18224	12.3417	7.58012e-31	1.89503e-31	1.77615e-31
GOTERM_CC_DIRECT	GO:0022625~cytosolic large ribosomal subunit	40	3.27332	5.74263e-30	RPL5, RPL30, RPL32, RPL10, RPL31, RPL34, RPLP1, RPL12, RPLP0, RPL11, RPL6, RPL7A, RPL18A, RPL36, RPL14, RPL35, RPLP2, SURF6, RPL13, RPL38, RPL37, RPL15, RPL18, RPL39, RPL19, RPL41, RPL23, RPL35A, RPL13A, RPL23A, RPL27A, RPL37A, NHP2, RPL24, RPL27, RPL26, RPL29, RPL28, UBA52, RPL26L1	1115	68	18224	9.61435	3.11251e-27	6.22501e-28	5.83452e-28
GOTERM_CC_DIRECT	GO:0005762~mitochondrial large ribosomal subunit	29	2.37316	3.66454e-22	MRPL38, MRPL16, MRPL17, MPV17L2, MRPL36, MRPL14, MRPL37, MRPL34, MRPL12, MRPL32, MRPL54, MRPL11, MRPL55, MRPL4, MRPL41, MRPL20, MRPL2, MRPL27, MRPL28, MRPL47, MRPL23, MRPL46, MRPL24, MRPL43, MRPL21, MRPL22, MRPL52, MRPL53, MRPL51	1115	48	18224	9.87474	1.98618e-19	3.3103e-20	3.10264e-20
GOTERM_CC_DIRECT	GO:0005759~mitochondrial matrix	66	5.40098	1.18004e-17	ACADVL, NDUFA10, NUDT1, NUDT2, ATP5C1, PARK7, ETFB, ALKBH7, TXN2, ABHD10, MTG1, CA5A, FASTK, FPGS, FDXR, IDH3B, PMPCA, GSTK1, TSFM, GPX1, GPT2, AMT, NME4, POLRMT, SIRT3, SUPV3L1, SARS2, NDUFS8, NDUFS7, SDHAF2, TST, SCO2, CLPP, SDHAF1, NDUFS3, PPIF, SUCLG1, HAGH, FXN, ATG4D, GCDH, FH, ECHS1, HSD17B10, DGUOK, HMGCL, PRDX5, GRPEL1, BLOC1S1, ATP5E, ATP5D, RPS3, NDUFA9, GADD45GIP1, TXNRD2, IDH3G, MMAB…	1115	327	18224	3.29887	6.3958e-15	9.13686e-16	8.5637e-16
GOTERM_CC_DIRECT	GO:0022627~cytosolic small ribosomal subunit	25	2.04583	4.2892e-17	RPS27L, RPS15, RPS14, RPS17, RPS15A, RPS16, RPS19, RPS3, RPS2, RPS11, RPS10, RPS13, RPS9, RPS7, RPS8, RPS6, MRPS18A, RPSA, HBA2, MRPS5, MRPS18C, RPS20, FAU, RPS21, RPS24	1115	48	18224	8.51271	2.32475e-14	2.90593e-15	2.72364e-15
GOTERM_CC_DIRECT	GO:0005753~mitochondrial proton-transporting ATP synthase complex	16	1.30933	2.18015e-14	ATPIF1, USMG5, ATP5J, ATP5C1, ATP5I, ATP5G3, ATP5H, ATP5G2, ATP5O, ATP5G1, ATP5L, ATP5J2, C14ORF2, ATP5E, ATP5D, PPIF	1115	21	18224	12.4529	1.17941e-11	1.31293e-12	1.23057e-12
GOTERM_CC_DIRECT	GO:0005829~cytosol	298	24.3863	3.48131e-13	RPL5, RPL30, RPL32, RPL31, RPL34, NUDT1, KEAP1, RPL6, TXNDC17, RPS15, PSMD8, RPS14, PSMD9, AS3MT, RPS17, RPS16, PSMD4, RPS19, CAPNS1, SNRPD2, RPL18A, TMEM88, RPL36, AP1S1, RPL35, RPL38, RPL37, RPS11, RPL39, RPS10, RPS13, GAMT, ENDOG, RPL23, NFKBIL1, MYL5, MYL6, RNF126, CDC37, HMBS, CSNK2B, RPL24, RPL27, SUCLG1, RPL26, RPL29, RPL28, UBA52, VPS28, ANAPC16, OAZ1, GABARAP, ANAPC11, DGUOK, PRDX2, PRDX…	1115	3315	18224	1.46927	1.88706e-10	1.88687e-11	1.76851e-11
GOTERM_CC_DIRECT	GO:0005763~mitochondrial small ribosomal subunit	16	1.30933	1.03914e-12	MRPS17, MRPS15, MRPS26, MRPS16, MRPS24, MRPS36, MRPS33, MRPS11, MRPS12, MRPS18A, MRPS2, MRPS21, MRPS7, MRPS5, MRPS18C, MRPS9	1115	25	18224	10.4604	5.63229e-10	5.12014e-11	4.79895e-11
GOTERM_CC_DIRECT	GO:0005730~nucleolus	107	8.75614	1.94338e-12	RPL5, RPL34, RRP1, PPAN, THYN1, RRP8, TXN2, FBL, RPS14, RPS19, SPATA24, RPL36, ARL6IP4, RPL35, RPS11, RPS10, CHCHD1, RPS13, CDK5RAP3, RPS9, RPS7, METTL1, IMP3, RPL23, PIH1D1, RPS6, ARID5A, DNTTIP1, WDR74, IMP4, GRWD1, NHP2, SNRPA, INO80B, INO80E, RPS19BP1, PRKRIP1, ANAPC11, DEDD2, WBSCR22, SURF6, ESRRA, NSUN5P1, NSUN5P2, NOP16, SURF2, TBCA, MRPL23, RCL1, TBL3, EIF6, MOB2, PIN4, SPRN, RPAIN, ZNF77…	1115	857	18224	2.04067	1.05329e-09	8.77758e-11	8.22696e-11
GOTERM_CC_DIRECT	GO:0005654~nucleoplasm	256	20.9493	3.1185e-12	POP5, POP7, KEAP1, RRP8, RPS15, PSMD8, LSM10, RPS14, PSMD9, ALKBH2, RPS17, RPS16, PSMD4, RPS19, SNRPD2, SPATA24, RPS11, RPS10, RPS13, IER2, SAP30BP, C17ORF49, METTL1, IMP3, NFKBIL1, NSMCE1, DNTTIP1, IMP4, GCAT, CDC34, SCO2, SARNP, CSNK2B, AURKAIP1, UBA52, ZNF394, ANAPC16, XPA, C9ORF78, ATP5H, DEDD2, ANAPC11, RRP7A, PPP4C, NTHL1, PNPO, WBSCR22, SURF6, ATRIP, RBM10, LHPP, NR2C2AP, HEXIM2, PRELID1, …	1115	2784	18224	1.50293	1.69023e-09	1.30018e-10	1.21861e-10
GOTERM_CC_DIRECT	GO:0005761~mitochondrial ribosome	16	1.30933	9.99784e-12	GADD45GIP1, NDUFA7, MRPS24, MRPS12, MRPL28, MRPL37, MRPL48, MRPL34, MRPL43, MRPL32, MRPL11, MRPL20, MRPL40, MRPL51, MTG1, CHCHD1	1115	28	18224	9.33965	5.41886e-09	3.87059e-10	3.62779e-10
GOTERM_CC_DIRECT	GO:0015935~small ribosomal subunit	14	1.14566	1.39347e-09	RPS9, IMP3, MRPS12, RPS6, MRPS2, RPSA, RPS15, RPS16, RPS3, RPS20, RPS2, FAU, RPS21, RPS24	1115	27	18224	8.47487	7.55259e-07	5.03506e-08	4.71921e-08
GOTERM_CC_DIRECT	GO:0005758~mitochondrial intermembrane space	22	1.80033	1.81343e-09	TIMM8A, NDUFA8, STOML2, PRELID1, NDUFB7, DIABLO, COX17, CHCHD10, NME4, TRIAP1, PARK7, TIMM10, PPOX, GFER, SOD1, COX6B1, CHCHD4, CHCHD5, CHCHD2, BLOC1S1, NDUFS5, THOP1	1115	74	18224	4.85914	9.8288e-07	6.143e-08	5.75765e-08
GOTERM_CC_DIRECT	GO:0070062~extracellular exosome	245	20.0491	2.18291e-09	RPL5, RPL30, RPL31, RPL34, C9ORF142, CISD1, NUDT1, ICAM3, ATP5C1, TXNDC17, PSMD8, RPS14, RPS17, RPS16, RPS19, CAPNS1, SNRPD2, AP1S1, NME2P1, RPS11, RPS10, RPS13, GAMT, GSTK1, ARRDC1, RPL23, SERPINF2, ECH1, HPCAL1, SLC6A13, JMJD8, MYL6, AZGP1, RBP5, CDC37, CSNK2B, BOLA2, RPL24, RPL27, SUCLG1, RPL26, RPL28, UBA52, VPS28, CUTA, TEX264, MGST3, PRKRIP1, ATP5H, SDSL, ATP5O, ATP5L, PRDX2, PRDX5, BLOC1S1…	1115	2811	18224	1.42454	1.18314e-06	6.95963e-08	6.52305e-08
GOTERM_CC_DIRECT	GO:0000502~proteasome complex	19	1.55483	9.86286e-09	UBXN1, PSMD13, SHFM1, ADRM1, RAD23A, PSMA7, PSMD8, PSMB6, PSMB7, PSMC5, PSMB4, PSMC3, PSMD4, PSMC4, PSMA2, PSMB3, PSMC1, PSMB1, PSMG3	1115	60	18224	5.17572	5.34566e-06	2.96982e-07	2.78352e-07
GOTERM_CC_DIRECT	GO:0005750~mitochondrial respiratory chain complex III	9	0.736498	1.8575e-07	UQCRB, UQCRQ, UQCRC1, UQCRFS1, CYC1, UQCR10, BCS1L, UQCRHL, UQCRH	1115	13	18224	11.3154	0.000100671	5.29876e-06	4.96637e-06
GOTERM_CC_DIRECT	GO:0070469~respiratory chain	10	0.818331	1.04883e-06	NDUFA8, NDUFA6, UQCRQ, NDUFS6, NDUFA10, NDUFC2, UQCR11, CYC1, UQCRHL, HIGD2A	1115	20	18224	8.1722	0.000568307	2.84234e-05	2.66404e-05
GOTERM_CC_DIRECT	GO:0000276~mitochondrial proton-transporting ATP synthase complex, coupling factor F(o)	8	0.654664	1.8892e-06	ATP5J, ATP5I, ATP5G3, ATP5H, ATP5G2, ATP5G1, ATP5L, ATP5J2	1115	12	18224	10.8963	0.00102342	4.87593e-05	4.57006e-05
GOTERM_CC_DIRECT	GO:0005751~mitochondrial respiratory chain complex IV	8	0.654664	3.87655e-06	COX8A, NDUFA4, COX4I1, COX4I2, COX5B, COX6A1, COX5A, COX7C	1115	13	18224	10.0581	0.00209889	9.55042e-05	8.95132e-05
GOTERM_CC_DIRECT	GO:0031966~mitochondrial membrane	18	1.473	4.93249e-05	NDUFA9, NDUFA13, NDUFA6, NDUFB6, NDUFA2, COX4I2, NDUFA1, NME2, SPG7, TAZ, PPOX, RNF5, NDUFAF4, NDUFAB1, NDUFS3, FKBP8, SLC25A10, BOK	1115	94	18224	3.12978	0.0263805	0.00116235	0.00108944
GOTERM_CC_DIRECT	GO:0015934~large ribosomal subunit	7	0.572831	0.000100982	MRPL2, RPL27A, RPL13A, RPL26, RPL26L1, MRPL32, MRPL22	1115	14	18224	8.1722	0.0532639	0.00218928	0.00205195
GOTERM_CC_DIRECT	GO:0005746~mitochondrial respiratory chain	7	0.572831	0.000100982	SURF1, COX7B, NDUFA13, UQCRB, UQCRC1, COX7A2, UQCRH	1115	14	18224	8.1722	0.0532639	0.00218928	0.00205195
GOTERM_CC_DIRECT	GO:0022624~proteasome accessory complex	7	0.572831	0.00035502	PSMD8, PSMC5, PSMC3, PSMD4, PSMD13, PSMC4, PSMC1	1115	17	18224	6.73004	0.175069	0.0074008	0.00693655
GOTERM_CC_DIRECT	GO:0008540~proteasome regulatory particle, base subcomplex	6	0.490998	0.000466385	PSMD9, PSMC5, PSMC3, PSMD4, PSMC4, PSMC1	1115	12	18224	8.1722	0.223408	0.00936225	0.00877495
GOTERM_CC_DIRECT	GO:0000275~mitochondrial proton-transporting ATP synthase complex, catalytic core F(1)	4	0.327332	0.000869674	ATP5EP2, ATP5E, ATP5D, ATP5C1	1115	4	18224	16.3444	0.375977	0.0168344	0.0157784
GOTERM_CC_DIRECT	GO:0005634~nucleus	378	30.9329	0.00114641	RPL5, RPL30, POP7, C9ORF142, RRP1, PPAN, NUDT1, THYN1, MT1X, ALKBH6, RRP8, RPL6, NUBP2, RPS15, PSMD8, UXT, LSM10, PSMD9, ALKBH2, ALKBH4, PSMD4, SPATA24, ARL6IP4, NME2P1, ZFPL1, RPS13, IER2, CDK5RAP3, GAMT, ZNF18, SAP30BP, MEF2B, MECR, ENDOG, METTL1, IMP3, NFKBIL1, PIH1D1, NSMCE1, DNTTIP1, PTOV1, WDR74, HDGFRP2, AARSD1, AZGP1, RNF126, CDC34, GRWD1, SARNP, CSNK2B, RPL27, PREB, C19ORF66, AURKAIP1, U…	1115	5415	18224	1.14094	0.462976	0.0214261	0.020082
GOTERM_CC_DIRECT	GO:0005839~proteasome core complex	7	0.572831	0.00126059	PSMB6, PSMB7, PSMB4, PSMA2, PSMB3, PSMB1, PSMA7	1115	21	18224	5.44813	0.49524	0.0227747	0.021346
GOTERM_CC_DIRECT	GO:0005742~mitochondrial outer membrane translocase complex	5	0.409165	0.00216519	TOMM40, TOMM7, TOMM5, TOMM22, TOMM6	1115	10	18224	8.1722	0.691121	0.0378559	0.0354812
GOTERM_MF_DIRECT	GO:0003735~structural constituent of ribosome	110	9.00164	1.3169e-70	RPL5, RPL30, RPL32, RPL31, RPL34, RPL6, RPS15, RPS14, RPS17, RPS16, RPS19, RPL18A, RPL36, RPL35, RPL38, RPL37, RPS11, RPL39, RPS10, RPS13, RPS9, RPS7, RPS8, IMP3, RPL23, RPS6, MRPS18A, RPSA, MRPS18C, RPL24, RPL27, RPL26, RPL29, RPL28, UBA52, MRPL16, MRPL17, MRPL14, MRPL12, MRPL11, MRPL20, RPL41, MRPL27, MRPL28, MRPL23, MRPL24, MRPL21, MRPL22, RPL27A, RPS20, RPS21, RPS24, MRPS17, SLC25A1, MRPS15, …	1080	222	16881	7.74487	1.25764e-67	1.25764e-67	1.23657e-67
GOTERM_MF_DIRECT	GO:0008137~NADH dehydrogenase (ubiquinone) activity	35	2.86416	2.96e-30	NDUFB9, NDUFA13, NDUFB8, NDUFB7, NDUFB6, NDUFB10, NDUFA12, NDUFB5, NDUFB4, NDUFA10, NDUFB3, NDUFB2, NDUFB1, NDUFV3, NDUFV2, NDUFV1, NDUFA9, NDUFA8, NDUFA7, NDUFA6, NDUFA5, NDUFA4, NDUFA3, NDUFA2, NDUFA1, NDUFC2, NDUFC1, NDUFS8, NDUFS7, NDUFS6, NDUFS5, NDUFAB1, NDUFS4, NDUFAF2, NDUFS3	1080	48	16881	11.3973	2.8268e-27	1.4134e-27	1.38972e-27
GOTERM_MF_DIRECT	GO:0044822~poly(A) RNA binding	159	13.0115	5.89779e-22	RPL5, RPL30, POP7, RPL32, RPL31, RRP1, PPAN, PEBP1, ATP5C1, RRP8, RPL6, RPS15, FBL, RPS14, RPS17, RPS16, PSMD4, RPS19, SNRPD2, RPL18A, RPL36, ARL6IP4, RPL35, RPS11, RPS10, CHCHD1, RPS13, C11ORF68, RPS9, RPS7, RPS8, IMP3, RPL23, RPS6, NOSIP, RPSA, POLRMT, TUFM, GRWD1, SARNP, NHP2, RPL24, PPIE, RPL27, SUCLG1, RPL26, RPL29, PPIB, RPL28, PPIA, SNRPA, RPS19BP1, PEF1, MEPCE, MRPL14, MRPL11, RRP7A, MRPL…	1080	1129	16881	2.20129	5.63239e-19	1.87746e-19	1.84601e-19
GOTERM_MF_DIRECT	GO:0003723~RNA binding	73	5.97381	3.54075e-09	RPL5, RPL30, RPL31, RPL34, RPL6, MRPL4, RPS15, FBL, RPS14, RPL7A, MRPL2, RPS16, RPL18A, SNRNP70, FASTK, RPL38, RPL37, RPL39, EIF5A, RPS7, GTF3A, THOC6, SUPV3L1, RPUSD1, RPUSD3, NHP2, RPL24, PPIE, RPL26, C19ORF66, SNRPF, RPL29, RPL28, SNRPA, TRUB2, RPL11, MRPL12, TIMM50, U2AF1L4, EXOSC7, EXOSC5, RPS15A, RPS3, RPL14, SURF6, RPL13, RPS2, SCAND1, RPL15, RPL18, EXOSC1, RPL19, CPSF4, NSUN5P1, RPL41, NS…	1080	547	16881	2.08598	3.38141e-06	8.45354e-07	8.31191e-07
GOTERM_MF_DIRECT	GO:0005515~protein binding	652	53.3552	9.15285e-09	POP5, RPL5, RPL30, POP7, RPL31, WDR83, ALKBH6, RRP8, FAM134C, LSM10, PSMD9, RABGEF1, COMTD1, ALKBH4, PSMD4, CAPNS1, TMEM88, FDXR, CDK5RAP3, HEMK1, ZNF18, GSTK1, SAP30BP, ACOT8, ENDOG, RPL23, PIH1D1, SERPINF2, HPCAL1, DNTTIP1, WDR74, HDGFRP2, HDHD3, RBP7, C19ORF60, RNF126, MYL6, BIN3, RBP5, SCO2, CLPP, SARNP, RPL24, RPL26, C19ORF66, RPL28, UBA52, VPS28, ZNF394, NPRL2, PRKRIP1, HHLA3, XPA, C9ORF78,…	1080	8785	16881	1.16006	8.74093e-06	1.74819e-06	1.7189e-06
GOTERM_MF_DIRECT	GO:0046933~proton-transporting ATP synthase activity, rotational mechanism	11	0.900164	1.40603e-08	ATP5EP2, ATP5E, ATP5D, ATP5C1, ATP5G3, ATP5H, ATP5G2, ATP5O, ATP5G1, ATP6V0C, ATP5L	1080	17	16881	10.1139	1.34275e-05	2.23794e-06	2.20044e-06
GOTERM_MF_DIRECT	GO:0019843~rRNA binding	15	1.2275	8.43693e-08	MRPS17, MRPS15, RPS9, IMP3, RPL12, RPL11, MRPL16, PPAN, RPL23A, ERAL1, MRPS7, MRPL11, MRPL20, RPL37, RPS11	1080	40	16881	5.86146	8.05695e-05	1.15104e-05	1.13175e-05
GOTERM_MF_DIRECT	GO:0004129~cytochrome-c oxidase activity	13	1.06383	1.28994e-07	COX8A, COX7B, SURF1, NDUFA4, COX4I1, COX4I2, COX7A2, COX6C, COX5B, COX6A1, COX5A, COX7C, COX6B1	1080	30	16881	6.77324	0.000123181	1.53986e-05	1.51406e-05
GOTERM_MF_DIRECT	GO:0008121~ubiquinol-cytochrome-c reductase activity	8	0.654664	4.3268e-07	UQCRB, UQCRQ, UQCRC1, UQCRFS1, UQCR11, UQCR10, UQCRHL, UQCRH	1080	10	16881	12.5044	0.000413124	4.59121e-05	4.51429e-05
GOTERM_MF_DIRECT	GO:0003954~NADH dehydrogenase activity	7	0.572831	1.68495e-06	NDUFA9, NDUFA13, NDUFS8, NDUFS7, NDUFS3, NDUFB1, NDUFV1	1080	8	16881	13.6767	0.00160783	0.000160912	0.000158217
GOTERM_MF_DIRECT	GO:0009055~electron carrier activity	18	1.473	4.821e-05	GCDH, NQO2, ACADVL, PTGES2, NDUFA12, HAAO, UQCR11, ETFB, COX5A, DHRS3, FDX1L, QDPR, POR, NDUFS6, NDUFAF2, NDUFS3, IDH3B, NDUFV2	1080	90	16881	3.12611	0.0449978	0.0041855	0.00411538
GOTERM_MF_DIRECT	GO:0008757~S-adenosylmethionine-dependent methyltransferase activity	8	0.654664	0.000108953	AS3MT, NSUN5P1, PRMT7, NSUN5P2, NSUN5, SUV39H1, MEPCE, RRP8	1080	19	16881	6.58129	0.098825	0.00867085	0.00852557
GOTERM_MF_DIRECT	GO:0070180~large ribosomal subunit rRNA binding	5	0.409165	0.000496946	RPLP1, RPL23, RPLP0, RPLP2, RPL19	1080	7	16881	11.1647	0.377929	0.0365064	0.0358948
GOTERM_MF_DIRECT	GO:0051087~chaperone binding	15	1.2275	0.000567868	SDF2L1, TIMM44, HSCB, TBCA, TIMM10, SOD1, DNAJB2, GRPEL1, CDC37, BAG1, DNLZ, ERP29, PFDN6, GET4, WRAP53	1080	81	16881	2.89455	0.418688	0.0387367	0.0380877
GOTERM_MF_DIRECT	GO:0015078~hydrogen ion transmembrane transporter activity	9	0.736498	0.00071847	ATP6V0B, ATP5J, ATP5I, ATP5G3, ATP5H, ATP5G1, ATP6V0C, ATP6V1F, ATP5L	1080	32	16881	4.39609	0.496608	0.0457426	0.0449762

## Sheet: DOWN-KEGG
Table S6B KEGG pathway enrichment of down-regulated DEGs
Category	Term	Count	%	PValue	Genes	List Total	Pop Hits	Pop Total	Fold Enrichment	Bonferroni	Benjamini	FDR
KEGG_PATHWAY	hsa03010:Ribosome	88	7.20131	1.24137e-65	MRPS17, RPL5, RPL30, MRPS15, MRPS16, RPL32, RPL31, RPL34, RPLP1, MRPS11, RPLP0, MRPS12, MRPL36, MRPL34, MRPL32, RPL6, MRPL4, RPS15, RPS14, RPL7A, RPS17, MRPL2, RPS16, RPS19, RPL18A, RPL36, RPLP2, RPL35, RPL38, RPL37, RPS11, RPL39, RPS10, RPS13, RPS9, RPS7, RPS8, RPL23, RPS6, MRPS18A, MRPS2, MRPS21, RPL13A, RPSA, MRPS7, MRPS5, MRPS18C, MRPS9, RPL37A, RPL24, RPL27, RPL26, RPL29, RPL28, UBA52, RPL10…	517	136	6879	8.60951	3.01653e-63	3.01653e-63	2.96687e-63
KEGG_PATHWAY	hsa00190:Oxidative phosphorylation	73	5.97381	6.27341e-47	NDUFA13, COX7B, NDUFA11, NDUFA12, COX4I1, COX4I2, NDUFA10, ATP5C1, ATP5G3, ATP5G2, COX6A1, ATP5G1, COX7C, UQCRFS1, COX8A, ATP6V0B, NDUFC2, NDUFC1, COX6B1, ATP5J2, NDUFS8, NDUFS7, NDUFS6, NDUFS5, NDUFS4, UQCRC1, NDUFS3, ATP6V0C, NDUFB9, NDUFB8, NDUFB7, UQCRB, NDUFB6, NDUFB10, NDUFB11, NDUFB5, NDUFB4, COX17, NDUFB3, NDUFB2, ATP5J, NDUFB1, ATP5I, COX7A2, UQCR11, UQCR10, ATP5H, ATP5O, COX5B, COX5A, U…	517	133	6879	7.30308	1.52444e-44	7.6222e-45	7.49673e-45
KEGG_PATHWAY	hsa05012:Parkinson's disease	68	5.56465	1.16807e-38	NDUFA13, COX7B, NDUFA11, NDUFA12, COX4I1, COX4I2, NDUFA10, ATP5C1, ATP5G3, PARK7, ATP5G2, COX6A1, ATP5G1, COX7C, UQCRFS1, COX8A, NDUFC2, NDUFC1, COX6B1, NDUFS8, NDUFS7, NDUFS6, NDUFS5, NDUFS4, UQCRC1, NDUFS3, PPIF, NDUFB9, NDUFB8, NDUFB7, UQCRB, NDUFB6, NDUFB10, NDUFB11, NDUFB5, NDUFB4, NDUFB3, NDUFB2, ATP5J, NDUFB1, COX7A2, UQCR11, UQCR10, ATP5H, ATP5O, COX5B, COX5A, UQCRH, UBB, ATP5E, ATP5D, CY…	517	142	6879	6.3717	2.8384e-36	9.46135e-37	9.3056e-37
KEGG_PATHWAY	hsa05010:Alzheimer's disease	70	5.72831	5.27391e-35	NDUFA13, COX7B, NDUFA11, NDUFA12, COX4I1, COX4I2, NDUFA10, ATP5C1, ATP5G3, ATP5G2, COX6A1, ATP5G1, COX7C, UQCRFS1, PSENEN, COX8A, NDUFC2, NDUFC1, COX6B1, NDUFS8, NDUFS7, NDUFS6, NDUFS5, NDUFS4, UQCRC1, NDUFS3, NDUFB9, NDUFB8, NDUFB7, UQCRB, NDUFB6, NDUFB10, NDUFB11, NDUFB5, NDUFB4, NDUFB3, NDUFB2, ATP5J, NDUFB1, COX7A2, UQCR11, UQCR10, ATP5H, ATP5O, COX5B, COX5A, HSD17B10, UQCRH, ATP5E, ATP5D, CY…	517	168	6879	5.544	1.28156e-32	3.2039e-33	3.15116e-33
KEGG_PATHWAY	hsa05016:Huntington's disease	74	6.05565	2.34916e-34	NDUFA13, COX7B, NDUFA11, NDUFA12, COX4I1, COX4I2, NDUFA10, CLTB, ATP5C1, ATP5G3, ATP5G2, COX6A1, ATP5G1, COX7C, UQCRFS1, COX8A, NDUFC2, NDUFC1, COX6B1, NDUFS8, NDUFS7, NDUFS6, NDUFS5, NDUFS4, UQCRC1, NDUFS3, PPIF, NDUFB9, NDUFB8, NDUFB7, UQCRB, NDUFB6, NDUFB10, NDUFB11, NDUFB5, NDUFB4, NDUFB3, NDUFB2, ATP5J, NDUFB1, COX7A2, UQCR11, UQCR10, ATP5H, ATP5O, COX5B, COX5A, UQCRH, ATP5E, ATP5D, AP2S1, P…	517	192	6879	5.1282	5.70845e-32	1.14169e-32	1.1229e-32
KEGG_PATHWAY	hsa04932:Non-alcoholic fatty liver disease (NAFLD)	56	4.58265	6.72799e-25	NDUFA13, COX7B, NDUFA11, NDUFA12, COX4I1, COX4I2, NDUFA10, COX6A1, COX7C, UQCRFS1, COX8A, NDUFC2, NDUFC1, COX6B1, NDUFS8, NDUFS7, NDUFS6, NDUFS5, NDUFS4, UQCRC1, NDUFS3, NDUFB9, NDUFB8, NDUFB7, UQCRB, NDUFB6, NDUFB10, NDUFB11, NDUFB5, NDUFB4, NDUFB3, NDUFB2, NDUFB1, COX7A2, UQCR11, UQCR10, COX5B, COX5A, UQCRH, CYC1, NDUFV3, NDUFV2, NDUFV1, NDUFA9, NDUFA8, NDUFA7, NDUFA6, NDUFA5, NDUFA4, NDUFA3, N…	517	151	6879	4.93453	1.6349e-22	2.72484e-23	2.67998e-23
KEGG_PATHWAY	hsa01100:Metabolic pathways	168	13.748	1.82999e-17	NDUFA13, NDUFA11, NDUFA12, NDUFA10, ATP5C1, SAT2, COX6A1, TM7SF2, NSDHL, UROD, FPGS, DHRS4L1, DHRS4L2, ACAA1, GAMT, ACOT8, MECR, PCYT2, AMY1A, OXSM, GPT2, COX6B1, ATP5J2, DPM2, PLA2G16, DPM3, HMBS, UQCRC1, PGP, SUCLG1, SLC27A5, GCDH, NDUFB10, UQCRB, NDUFB11, COX17, AK1, ATP5J, ATP5I, ATP5H, SDSL, ATP5O, UQCRH, ATP5L, PTDSS2, DGUOK, EBP, ATP5E, ATP5D, AFMID, PMVK, PNPO, INPP5K, HYI, CYC1, NDUFV3, …	517	1219	6879	1.83375	4.44688e-15	6.35268e-16	6.24811e-16
KEGG_PATHWAY	hsa04260:Cardiac muscle contraction	20	1.63666	1.65761e-06	COX8A, COX7B, UQCRB, COX4I1, COX4I2, COX7A2, UQCR11, UQCR10, COX6C, COX5B, COX6A1, COX5A, COX7C, UQCRHL, UQCRH, COX6B1, UQCRQ, UQCRC1, UQCRFS1, CYC1	517	75	6879	3.54816	0.000402718	5.03498e-05	4.9521e-05
KEGG_PATHWAY	hsa03050:Proteasome	15	1.2275	2.10271e-06	PSMD13, SHFM1, PSMA7, PSMD8, PSMB6, PSMB7, PSMC5, PSMB4, PSMC3, PSMD4, PSMC4, PSMA2, PSMB3, PSMC1, PSMB1	517	44	6879	4.536	0.000510829	5.67732e-05	5.58387e-05
KEGG_PATHWAY	hsa04122:Sulfur relay system	6	0.490998	0.000427425	MPST, CTU2, TRMU, CTU1, TST, URM1	517	10	6879	7.98337	0.0986723	0.0103864	0.0102155
KEGG_PATHWAY	hsa04146:Peroxisome	16	1.30933	0.00112649	PEX16, GSTK1, ACOT8, ECH1, MPV17L2, DHRS4, SOD1, HMGCL, PRDX5, PXMP2, PMVK, DHRS4L1, PEX11G, DECR2, ACAA1, PAOX	517	83	6879	2.56494	0.239586	0.0248853	0.0244757
